# Supplementary material for: Concept annotation in the CRAFT corpus
Source: Springer Nature journal article supplement (doi:10.1186/1471-2105-13-161), 2012-07-09

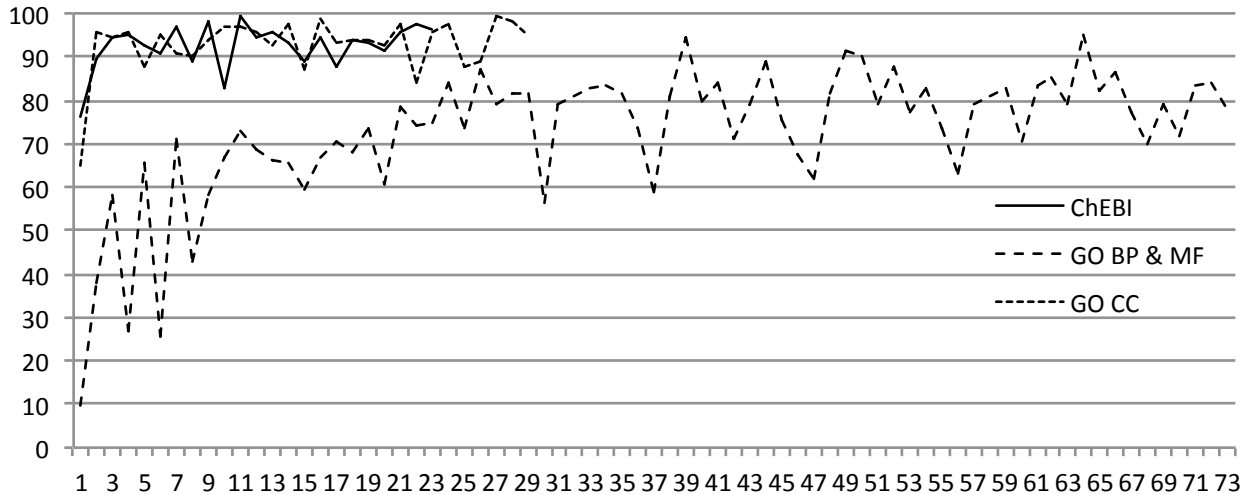

Supplement: 12859_2011_5323_MOESM3_ESM.pdf [file 12859_2011_5323_MOESM3_ESM.pdf]
